# Supplementary material for: Mind-Body Exercise (Wuqinxi) for Patients with Chronic Obstructive Pulmonary Disease: A Systematic Review and Meta-Analysis of Randomized Controlled Trials
Source: PubMed Central journal article supplement (PMC6338907; doi:10.3390/ijerph16010072), 2018-12-28
Supplement: ijerph-16-00072-s001.pdf [file ijerph-16-00072-s001.pdf]

Table S1 The standard data for the included studies.

| Study               | Wuqinxi gourp       |                     |    | Control group      |                     |    |
|---------------------|---------------------|---------------------|----|--------------------|---------------------|----|
|                     | Baseline            | Post-test           | N  | Baseline           | Post-test           | N  |
| Gao, et al 2017     | 6WMD=332.67±23.77   | 6WMD=417.56±19.73   | 36 | 6WMD=328.67±22.86  | 6WMD=350.78±23.39   | 36 |
|                     | FEV1=1.33±0.37      | FEV1=1.33±0.37      |    | FEV1=1.29±0.32     | FEV1=1.25±0.31      |    |
|                     | FEV1%=43.3±8.94     | FEV1%=55.08±8.16    |    | FEV1%=44.51±10.58  | FEV1%=44.61±9.89    |    |
|                     | FEV1FVC=40.17±8.91  | FEV1FVC=55.31±9.41  |    | FEV1FVC=38.4±11.55 | FEV1FVC=43.55±8.92  |    |
| Xing, et al 2017    | 6WMD=446.92±94.10   | 6WMD=454.05±71.2    | 31 | 6WMD=446.78±93.52  | 6WMD=497.89±77.42   | 31 |
|                     | FEV1%=73.58±6.35    | FEV1%=75.37±6.18    |    | FEV1%=73.25±6.31   | FEV1%=79.41±5.63    |    |
|                     | FEV1FVC=57.94±5.06  | FEV1FVC=54.95±5.08  |    | FEV1FVC=61.2±4.83  | FEV1FVC=55.02±4.8   |    |
| Tan et al 2016      | CCQ=32.58±3.74      | CCQ=17.06±3.45      | 50 | CCQ=94.56±1.63     | CCQ=34.82±4.21      | 50 |
| Chen et al 2015     | CCQ=20.02±4.78      | CCQ=15.61±4.2       | 48 | CCQ=20.51±4.75     | CCQ=20.02±5.27      | 45 |
| He et al 2015       | CCQ=23.56±2.12      | CCQ=21.81±1.2       | 48 | CCQ=23.78±2.36     | CCQ=23.82±2.49      | 45 |
| Wei et al 2015      | FEV1%=64.91±8.72    | FEV1%=61.89±8.77    | 48 | FEV1%=64.55±6.03   | FEV1%=58.82±5.76    | 45 |
|                     | FEV1FVC=62.14±5.4   | FEV1FVC=58.97±5.63  |    | FEV1FVC=61.26±6.25 | FEV1FVC=54.31±6.45  |    |
| Zhao, et al 2015    | 6WMD=398.96±21.41   | 6WMD=439.04±31.27   | 30 | 6WMD=403.12±20.97  | 6WMD=401.59±26.67   | 30 |
|                     | FEV1=85.8±4.12      | FEV1=86±3.71        |    | FEV1=87.65±4.94    | FEV1=86.65±4.29     |    |
|                     | FEV1%=55.68±4.69    | FEV1%=55.92±3.95    |    | FEV1%=57.46±4.31   | FEV1%=57.77±3.89    |    |
|                     | FEV1FVC=64.34±3.96  | FEV1FVC=64.62±3.65  |    | FEV1FVC=65.44±3.36 | FEV1FVC=65.17±2.82  |    |
| Zhu, et al 2010 (1) | 6WMD=342.3±48.7     | 6WMD=447.6±61.7     | 26 | 6WMD=334.9±38.6    | 6WMD=456.9±43.4     | 27 |
|                     | FEV1=1.48±0.29      | FEV1=1.74±0.82      |    | FEV1=1.45±0.3      | FEV1=1.63±0.46      |    |
|                     | FEV1%=55.02±10.87   | FEV1%=67.07±15.98   |    | FEV1%=54.09±9.62   | FEV1%=60.67±14.61   |    |
|                     | FEV1FVC=64.92±10.74 | FEV1FVC=76.14±10.67 |    | FEV1FVC=64.15±8.76 | FEV1FVC=70.97±12.87 |    |
| Zhu, et al 2010 (2) | 6WMD=342.3±48.7     | 6WMD=447.6±61.7     | 26 | 6WMD=324.6±52.82   | 6WMD=319.5±41.4     | 21 |
|                     | FEV1=1.48±0.29      | FEV1=1.74±0.82      |    | FEV1=1.42±0.45     | FEV1=1.41±0.18      |    |
|                     | FEV1%=55.02±10.87   | FEV1%=67.07±15.98   |    | FEV1%=53.07±12.02  | FEV1%=52.56±10.73   |    |
|                     | FEV1FVC=64.92±10.74 | FEV1FVC=76.14±10.67 |    | FEV1%=63.51±9.58   | FEV1%=62.76±10.04   |    |
